# Supplementary material for: Room temperature deep eutectic solvents of (1S)-(+)-10-camphorsulfonic acid and sulfobetaines: hydrogen bond-based mixtures with low ionicity and structure-dependent toxicity
Source: Royal Society of Chemistry journal article supplement (doi:10.1039/c5ra03932k), 2015-01-01
Supplement: c5ra03932k1.pdf [file c5ra03932k1.pdf]

Electronic Supplementary Information for:

ROOM TEMPERATURE DEEP EUTECTIC SOLVENTS OF (1S)-(+)-10-CAMPHORSULFONIC ACID AND  
SULFOBETAINES: HYDROGEN BOND-BASED MIXTURES WITH LOW IONICITY AND STRUCTURE-  
DEPENDENT TOXICITY

Germani, Raimondo (contact); Cardellini, Fabio; Cardinali, Gianluigi; Corte, Laura; Roscini, Luca;  
Spreti, Nicoletta; Tiecco, Matteo

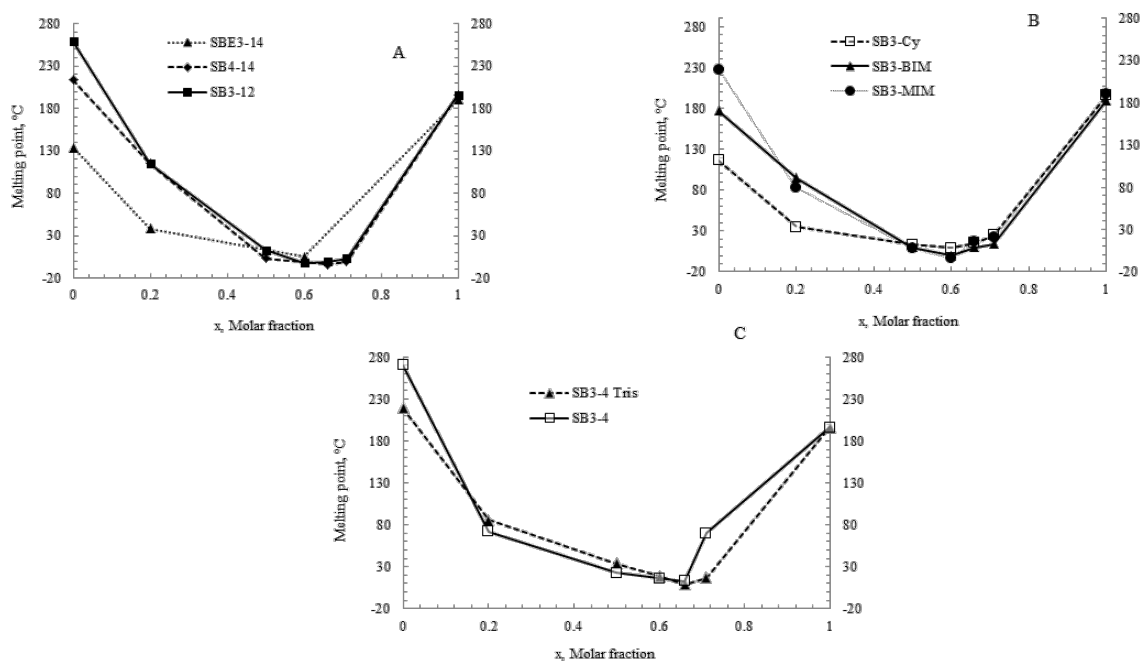

**Fig. S1:** Melting points of SB / CSA mixtures as a function of acid molar fraction  $x$

**Panel A:** (solid triangles) SBE3-14 / CSA mixture, (solid diamonds) SB4-14 / CSA mixture, (hollow squares) SB3-12 / CSA mixture

**Panel B:** (hollow squares) SB3-Cy / CSA mixture, (solid triangles) SB3-BIM / CSA mixture, (hollow circles) SB3-MIM / CSA mixture

**Panel C:** (hollow triangles) SB3-8 bis / CSA mixture, (hollow squares) SB3-4 tris / CSA mixture, (solid squares) SB3-4 / CSA mixture, (hollow diamonds) SBP3-14 / CSA mixture

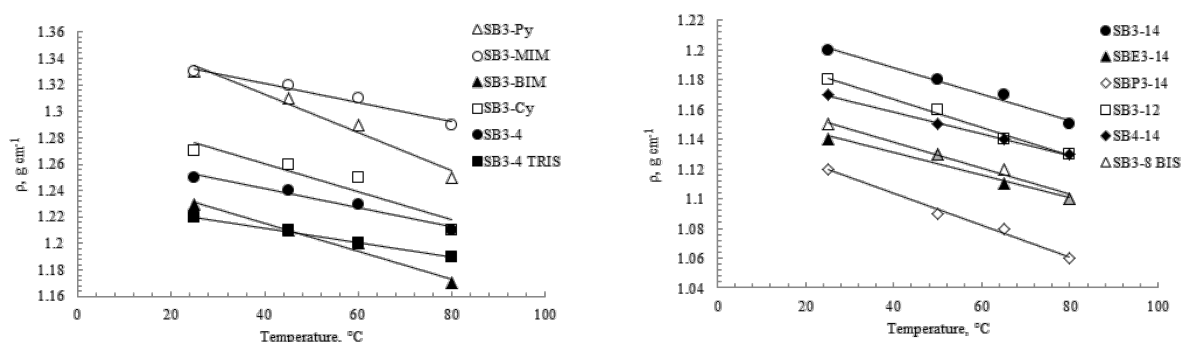

**Figure S2:** Density of SB / CSA mixtures as a function of temperature

**Panel A (Aromatic-Aliphatic SB):** (hollow triangles) SB3-Py / CSA mixture, (hollow circles) SB3-MIM / CSA mixture, (solid triangles) SB3-BIM / CSA mixture, (hollow squares) SB3-Cy / CSA mixture, (solid circles) SB3-4 / CSA mixture, (solid squares) SB3-4 Tris / CSA mixture.

**Panel B (Amphiphilic SB):** (solid circles) SB3-14 / CSA mixture, (solid triangles) SBE3-14 / CSA mixture, (hollow diamonds) SBP3-14 / CSA mixture, (hollow squares) SB3-12 / CSA mixture, (solid diamonds) SB4-14 / CSA mixture, (hollow triangles) SB3-8 Bis / CSA mixture.

**Table S1:** Surface Tension of SB/CSA mixture at 25 °C.

| <b>Entry</b> | <b>SB</b>  | <b>ST<br/>(mN m<sup>-1</sup>)</b> |
|--------------|------------|-----------------------------------|
| 1            | SB3-12     | 25.1                              |
| 2            | SB3-14     | 36.5                              |
| 3            | SBE3-14    | 33.6                              |
| 4            | SBP3-14    | 34.8                              |
| 5            | SB3-8 bis  | 37.5                              |
| 6            | SB3-MIM    | 36.5                              |
| 7            | SB3-BIM    | 32.9                              |
| 8            | SB4-14     | 33.8                              |
| 9            | SB3-Cy     | 40.5                              |
| 10           | SB3-Py     | 33.4                              |
| 11           | SB3-4      | 43.3                              |
| 12           | SB3-4 Tris | 42.1                              |
